# Supplementary material for: Accumulation of Major, Minor and Trace Elements in Pine Needles (Pinus nigra) in Vienna (Austria)
Source: MDPI journal article supplement (doi:10.3390/molecules26113318), 2021-06-01
Supplement: s1 [file s1]

**Table S1.** Figures of merit of the analytical procedure.

| Element    | LOQ [in mg/kg dry matter] | Precision [%] | Recovery* [%] |
|------------|---------------------------|---------------|---------------|
| Silver     | 0.002                     | 1.7           |               |
| Aluminium  | 1.9                       | 2.6           | 99            |
| Arsenic    | 0.02                      | 1.1           | 91            |
| Boron      | 0.32                      | 2.7           | 91            |
| Barium     | 0.01                      | 0.7           | 95            |
| Beryllium  | 0.001                     | 1.5           |               |
| Calcium    | 0.42                      | 1.9           | 101           |
| Cadmium    | 0.006                     | 1.4           | 98            |
| Cobalt     | 0.004                     | 0.8           | 100           |
| Chromium   | 0.005                     | 1.5           | **            |
| Copper     | 0.02                      | 0.8           | 104           |
| Iron       | 0.19                      | 1.0           | 96            |
| Potassium  | 0.84                      | 2.4           | 95            |
| Lithium    | 0.002                     | 1.4           |               |
| Magnesium  | 0.61                      | 1.4           | 96            |
| Manganese  | 0.02                      | 1.3           | 94            |
| Molybdenum | 0.002                     | 1.5           |               |
| Sodium     | 0.20                      | 2.3           | 107           |
| Nickel     | 0.02                      | 1.3           | 97            |
| Lead       | 0.003                     | 0.07          | 94            |
| Selenium   | 0.02                      | 2.6           | 107           |
| Strontium  | 0.007                     | 0.7           |               |
| Uranium    | 0.001                     | 1.0           |               |
| Vanadium   | 0.003                     | 1.4           |               |
| Zinc       | 0.04                      | 0.7           | 99            |

\*recovery only determined for the elements with certified or reference values for SRM 1575a. \*\* only range given for SRM.
